# Supplementary material
Source: Springer Nature journal article supplement (https://www.springermedizin.de/resource/supplementary/12947_2009_279_MOESM3_ESM.pdf/9556602)

Baseline

Normal

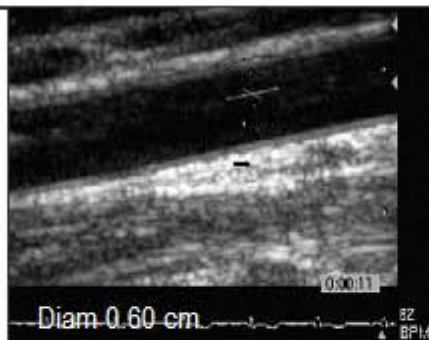

Mental Stress

Hypertensive

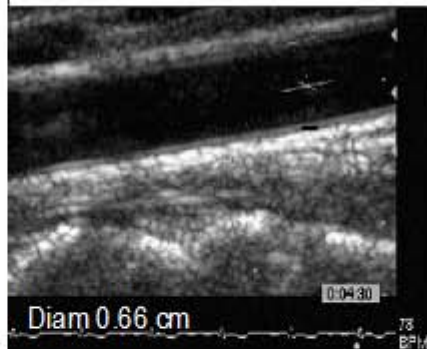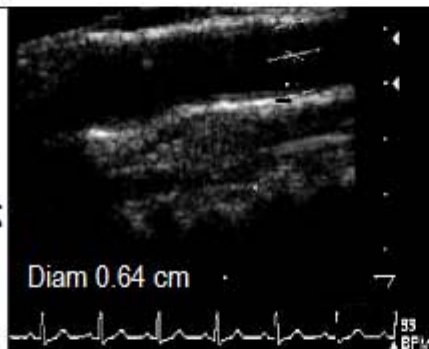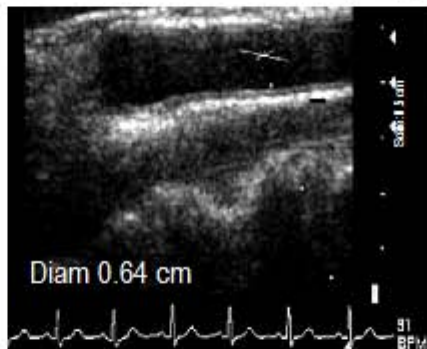

Supplement: MOESM3 [file 9556602]
